# Supplementary material
Source: PubMed Central journal article supplement (PMC8396077)
Supplement: NIHMS1727711-supplement-Supplemental_Material_1.pdf [file NIHMS1727711-supplement-Supplemental_Material_1.pdf]

| CVLT II Item | Item recalled during list learning (yes = 1, no = 0)? | Number of times item was recalled during list learning. | Items recalled less than 3 times during learning (yes = 1, no = 0)? | Recalled during learning trials but no recall during SDFR, SDCR, LDFR, or LDCR | Recalled during learning trials, but not recalled consistently across SDFR, SDCR, LDFR, or LDCR |
|--------------|-------------------------------------------------------|---------------------------------------------------------|---------------------------------------------------------------------|--------------------------------------------------------------------------------|-------------------------------------------------------------------------------------------------|
| 1            |                                                       |                                                         |                                                                     |                                                                                |                                                                                                 |
| 2            |                                                       |                                                         |                                                                     |                                                                                |                                                                                                 |
| 3            |                                                       |                                                         |                                                                     |                                                                                |                                                                                                 |
| 4            |                                                       |                                                         |                                                                     |                                                                                |                                                                                                 |
| 5            |                                                       |                                                         |                                                                     |                                                                                |                                                                                                 |
| 6            |                                                       |                                                         |                                                                     |                                                                                |                                                                                                 |
| 7            |                                                       |                                                         |                                                                     |                                                                                |                                                                                                 |
| 8            |                                                       |                                                         |                                                                     |                                                                                |                                                                                                 |
| 9            |                                                       |                                                         |                                                                     |                                                                                |                                                                                                 |
| 10           |                                                       |                                                         |                                                                     |                                                                                |                                                                                                 |
| 11           |                                                       |                                                         |                                                                     |                                                                                |                                                                                                 |
| 12           |                                                       |                                                         |                                                                     |                                                                                |                                                                                                 |
| 13           |                                                       |                                                         |                                                                     |                                                                                |                                                                                                 |
| 14           |                                                       |                                                         |                                                                     |                                                                                |                                                                                                 |
| 15           |                                                       |                                                         |                                                                     |                                                                                |                                                                                                 |
| 16           |                                                       |                                                         |                                                                     |                                                                                |                                                                                                 |
|              | <b>A) Sum</b>                                         |                                                         | <b>B) Sum</b>                                                       | <b>C) Sum</b>                                                                  | <b>D) Sum</b>                                                                                   |

|                                      |                                 |                                 |
|--------------------------------------|---------------------------------|---------------------------------|
| <b>Wright Encoding Deficit Index</b> | <b>Wright Retention Deficit</b> | <b>Wright Retrieval Deficit</b> |
| <b>B) Sum</b>                        | <b>C) Sum/A)Sum</b>             | <b>D) Sum/A)Sum</b>             |
