# Supplementary material
Source: PubMed Central journal article supplement (PMC8396077)
Supplement: NIHMS1727711-supplement-Supplemental_Material_2.pdf [file NIHMS1727711-supplement-Supplemental_Material_2.pdf]

| CVLT II<br>Item | Trial 1 | Trial 2 | Trial 3 | Trial 4 | Trial 5 | SDFR | LDFR | SDCR | LDCR | Item recalled during list learning (yes = 1, no = 0)? | Number of times item was recalled during list learning | Items recalled less than 3 times during learning (yes = 1, no = 0)? | Recalled during learning trials but no recall during SDFR, SDCR, LDFR, or LDCR | Recalled during learning trials, but not recalled consistently across SDFR, SDCR, LDFR, or LDCR |
|-----------------|---------|---------|---------|---------|---------|------|------|------|------|-------------------------------------------------------|--------------------------------------------------------|---------------------------------------------------------------------|--------------------------------------------------------------------------------|-------------------------------------------------------------------------------------------------|
| 1)              |         | 1       | 1       | 1       | 1       | 1    | 1    | 1    | 1    | 1                                                     | 4                                                      | 0                                                                   | 0                                                                              | 0                                                                                               |
| 2)              | 1       | 1       | 1       | 1       | 1       | 1    | 1    | 1    | 1    | 1                                                     | 5                                                      | 0                                                                   | 0                                                                              | 0                                                                                               |
| 3)              |         | 1       | 1       | 1       | 1       | 1    | 1    | 1    | 1    | 1                                                     | 4                                                      | 0                                                                   | 0                                                                              | 0                                                                                               |
| 4)              |         |         |         |         |         |      | 1    | 1    | 1    | 0                                                     | 0                                                      | 1                                                                   | 0                                                                              | 0                                                                                               |
| 5)              |         |         | 1       | 1       | 1       | 1    | 1    | 1    | 1    | 1                                                     | 3                                                      | 0                                                                   | 0                                                                              | 0                                                                                               |
| 6)              |         | 1       | 1       | 1       | 1       | 1    | 1    | 1    | 1    | 1                                                     | 4                                                      | 0                                                                   | 0                                                                              | 0                                                                                               |
| 7)              |         |         | 1       | 1       | 1       | 1    | 1    | 1    | 1    | 1                                                     | 3                                                      | 0                                                                   | 0                                                                              | 0                                                                                               |
| 8)              | 1       | 1       |         | 1       | 1       | 1    | 1    | 1    | 1    | 1                                                     | 4                                                      | 0                                                                   | 0                                                                              | 0                                                                                               |
| 9)              | 1       | 1       | 1       | 1       |         | 1    | 1    | 1    | 1    | 1                                                     | 4                                                      | 0                                                                   | 0                                                                              | 0                                                                                               |
| 10)             |         |         |         |         |         |      |      |      |      | 0                                                     | 0                                                      | 1                                                                   | 0                                                                              | 0                                                                                               |
| 11)             |         |         |         |         |         |      |      |      |      | 0                                                     | 0                                                      | 1                                                                   | 0                                                                              | 0                                                                                               |
| 12)             |         | 1       | 1       | 1       | 1       | 1    | 1    | 1    | 1    | 1                                                     | 4                                                      | 0                                                                   | 0                                                                              | 0                                                                                               |
| 13)             |         | 1       | 1       | 1       | 1       | 1    | 1    | 1    | 1    | 1                                                     | 4                                                      | 0                                                                   | 0                                                                              | 0                                                                                               |
| 14)             | 1       |         | 1       | 1       | 1       |      | 1    | 1    | 1    | 1                                                     | 4                                                      | 0                                                                   | 0                                                                              | 1                                                                                               |
| 15)             | 1       | 1       | 1       | 1       | 1       | 1    | 1    | 1    | 1    | 1                                                     | 5                                                      | 0                                                                   | 0                                                                              | 0                                                                                               |
| 16)             | 1       | 1       | 1       | 1       | 1       | 1    | 1    | 1    | 1    | 1                                                     | 5                                                      | 0                                                                   | 0                                                                              | 0                                                                                               |

|              |              |              |              |
|--------------|--------------|--------------|--------------|
| <b>A sum</b> | <b>B sum</b> | <b>C Sum</b> | <b>D Sum</b> |
| 13           | 3            | 0            | 1            |

|                                                  |                                         |                                         |
|--------------------------------------------------|-----------------------------------------|-----------------------------------------|
| <b>Wright<br/>Encoding<br/>Deficit<br/>Index</b> | <b>Wright<br/>Retention<br/>Deficit</b> | <b>Wright<br/>Retrieval<br/>Deficit</b> |
| 3                                                | 0                                       | 0.077                                   |
